# Supplementary material
Source: PubMed Central journal article supplement (PMC5038238)
Supplement: AAC.00591-16_zac010165536so1.pdf [file AAC.00591-16_zac010165536so1.pdf]

1 **Supplementary Material**

2 **Figure S1.** Urinary creatinine concentrations according to vancomycin exposure measures.

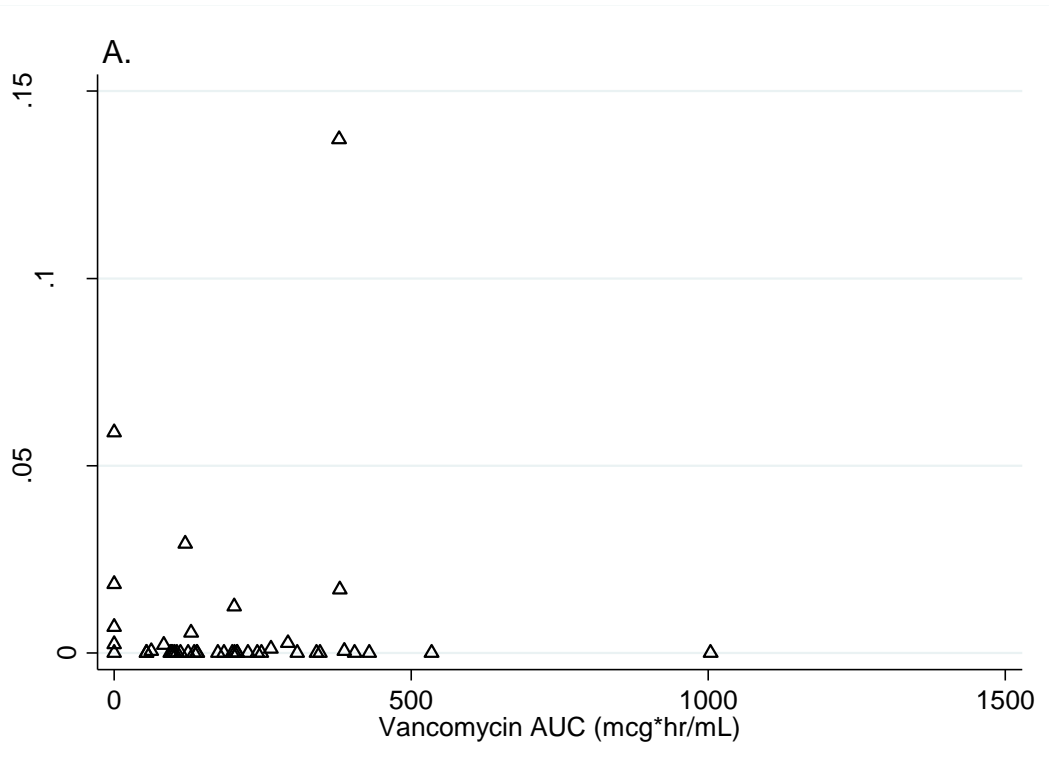

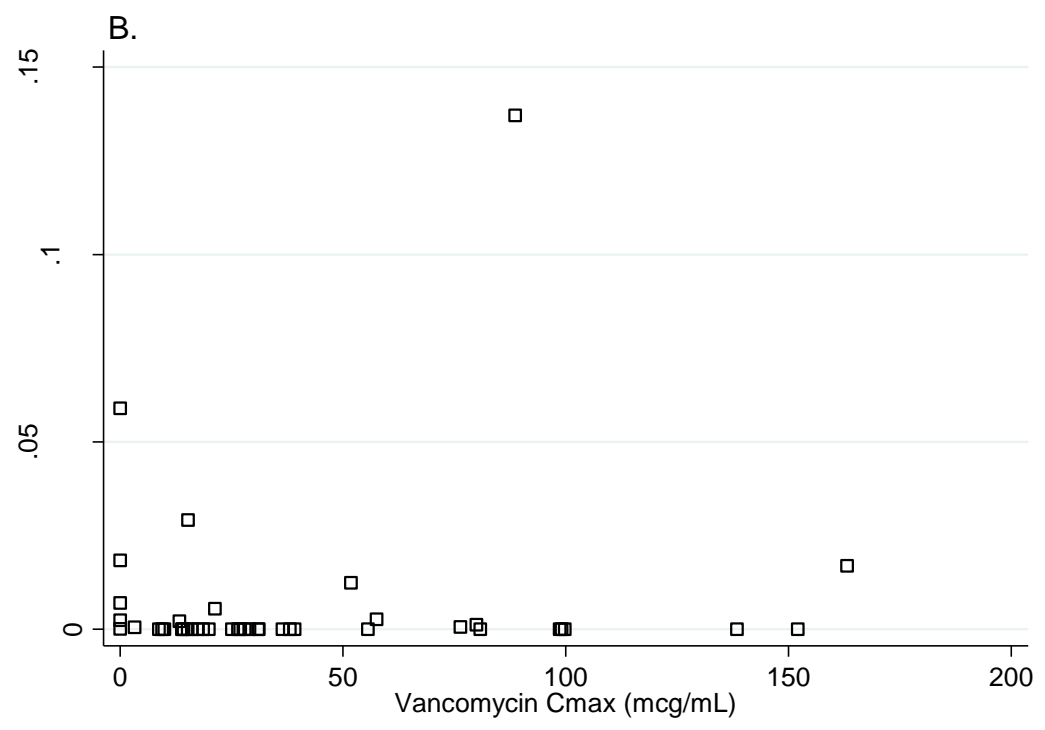

4

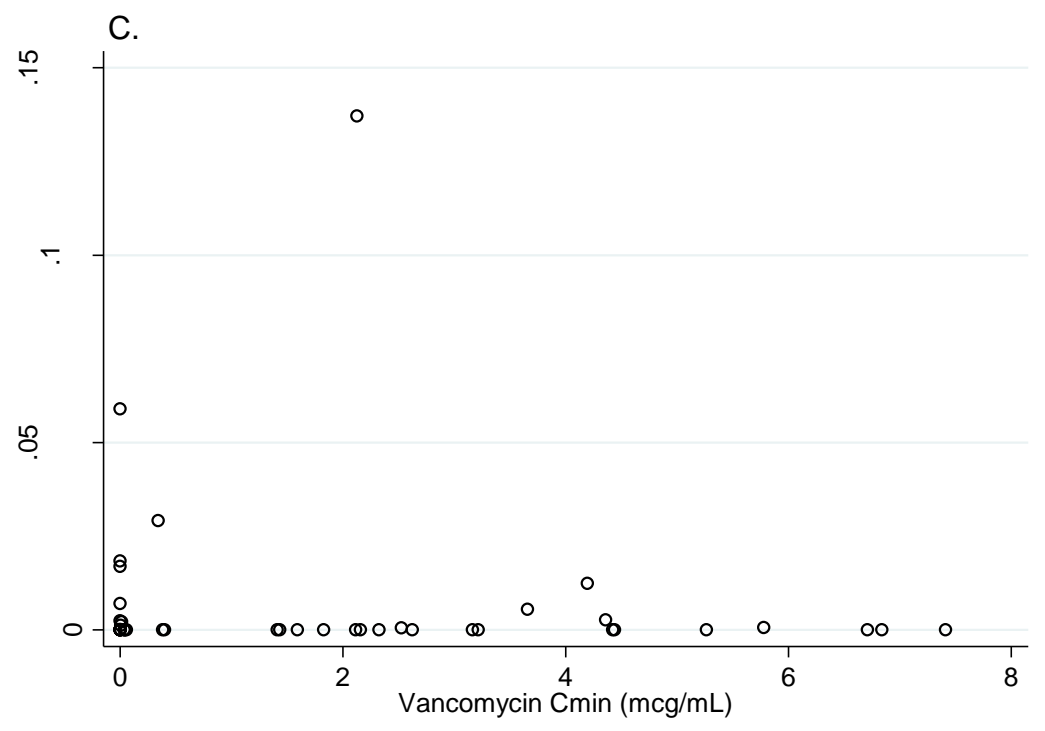

5

- 6 **Figure legend:** All non-parametric correlations  $P > 0.05$ . Panels: A) urinary creatinine v.  $AUC_{0-24\text{ h}}$   
7 ( $\mu\text{g}\cdot\text{hr}/\text{L}$ ); B) urinary creatinine v.  $C_{\text{max}0-24\text{ h}}$  ( $\mu\text{g}/\text{mL}$ ); C) urinary creatinine v.  $C_{\text{min}0-24\text{ h}}$  ( $\mu\text{g}/\text{mL}$ ).

8 **Table S1.** Summary of sensitive and traditional urinary AKI biomarkers according to vancomycin exposure group and protocol duration

| Experimental condition                   | One-day protocol |                        |         | Three-day protocol    |                        |         |
|------------------------------------------|------------------|------------------------|---------|-----------------------|------------------------|---------|
|                                          | Control          | Vancomycin             | P-value | Control               | Vancomycin             | P-value |
| Number of animals (n/N)                  | 5/52             | 22/52                  |         | 5/52                  | 20/52                  |         |
| Clusterin (ng/mL), median (IQR)          | 225 (205-243)    | 291 (191-436), n=21    | 0.31    | 245 (208-344)         | 338 (155-619), n=17    | 0.72    |
| Cystatin C (ng/mL), mean±SD              | 2.0±0.77         | 3.1±1.4, n=21          | 0.10    | 3.5±0.63              | 2.8±1.4, n=17          | 0.26    |
| KIM-1 (ng/mL), median (IQR)              | 0.46 (0.28-0.59) | 0.83 (0.52-1.34), n=21 | 0.02    | 1.21 (0.59-1.23)      | 1.40 (0.40-7.37), n=17 | 0.72    |
| Osteopontin (ng/mL), median (IQR)        | 0.03 (0.03-0.03) | 0.06 (0.05-0.13), n=21 | 0.001   | 0.04 (0.04-0.16)      | 0.07 (0.08-0.16), n=17 | 0.15    |
| Lipocalin-2/NGAL (ng/mL), mean±SD        | 6.1±3.4          | 10.8±4.6, n=21         | 0.04    | 13.7±2.4              | 12.2±5.6, n=17         | 0.55    |
| Urinary Creatinine (mg/dL), median (IQR) | —                | 0 (0-0)                | —       | 0.007 (0.002 - 0.018) | 0 (0-0.0005)           | 0.62    |

9 **Table legend:** Urinary endpoints stratified by experimental condition (i.e., vancomycin or saline control) and protocol duration (1 or 3 days).

10 **Abbreviations:** IQR, interquartile range; KIM-1, kidney injury molecule 1, SD, standard deviation
